# Supplementary material
Source: PubMed Central journal article supplement (PMC6058794)
Supplement: 2017.178830.SUEHARA_SUPPL.pdf [file 2017.178830.SUEHARA_SUPPL.pdf]

**Liquid biopsy for the identification of intravascular large B-cell lymphoma**

Yasuhito Suehara,<sup>1</sup> Mamiko Sakata-Yanagimoto,<sup>2,3</sup> Keiichiro Hattori,<sup>1</sup> Toru Nanmoku,<sup>4</sup> Takayoshi Itoh,<sup>5</sup> Daisuke Kaji,<sup>1,6</sup> Go Yamamoto,<sup>6</sup> Yoshiaki Abe,<sup>7</sup> Kentaro Narita,<sup>7</sup> Masami Takeuchi,<sup>7</sup> Kosei Matsue,<sup>7</sup> Taiki Sato,<sup>8</sup> Masayuki Noguchi,<sup>8</sup> Naoko Baba,<sup>2</sup> Tatsuhiro Sakamoto,<sup>2</sup> Manabu Kusakabe,<sup>2,3</sup> Naoki Kurita,<sup>2,3</sup> Takayasu Kato,<sup>2,3,4</sup> Yasuhisa Yokoyama,<sup>2,3</sup> Hidekazu Nishikii,<sup>2,3</sup> Naoshi Obara,<sup>2,3</sup> Yuichi Hasegawa<sup>2,3</sup> and Shigeru Chiba<sup>2,3,9</sup>

<sup>1</sup>Department of Hematology, Graduate School of Comprehensive Human Sciences, University of Tsukuba, Ibaraki; <sup>2</sup>Department of Hematology, University of Tsukuba Hospital, Ibaraki; <sup>3</sup>Department of Hematology, Faculty of Medicine, University of Tsukuba, Ibaraki; <sup>4</sup>Department of Clinical Laboratory, University of Tsukuba Hospital, Ibaraki; <sup>5</sup>Department of Hematology, JA Toride Medical Center, Toride, Ibaraki; <sup>6</sup>Department of Hematology, Toranomon Hospital, Tokyo; <sup>7</sup>Division of Hematology, Department of Internal Medicine, Kameda Medical Center, Kamogawa, Chiba; <sup>8</sup>Department of Pathology, Faculty of Medicine, University of Tsukuba and <sup>9</sup>Life Science Center of Tsukuba Advanced Research Alliance, University of Tsukuba, Ibaraki, Japan

Correspondence: schiba-ky@umin.net  
doi:10.3324/haematol.2017.178830

## **Supplementary methods**

Timing of sample collections

DNA extractions and analysis

Primer designs, constructing libraries, and variant calling pipelines in targeted sequencing

Sanger Sequencing

Longitudinal analysis of cell-free DNA

Comparison analysis of cell-free DNAs extracted from paired serum and plasma samples

Droplet digital PCR analysis

Statistical analysis

## **Supplementary References**

### **Supplementary Tables**

Table S1. List of genes sequenced in targeted sequencing

Table S2. Case description of 27 patients with intravascular large B-cell lymphoma

Table S3. Results of immunohistochemistry

Table S4. Concentration of cell-free DNA

Table S5. List of variants in targeted sequencing

Table S6. Coverage analysis of targeted regions

Table S7. Three measures indicating aberrant somatic hypermutations in *PIMI*

Table S8. Results of droplet digital PCR for L265P *MYD88* detection

Table S9. Primers used for Sanger sequencing

Table S10. Primers used for longitudinal analysis and those for comparative analysis of serum and plasma samples

### **Supplementary Figures**

Figure S1. Workflow of the study

Figure S2. Comparison of variant allele frequencies in tissue-derived DNA with those in cell-free DNA measured by digital droplet PCR for L265P *MYD88* among mutation-positive patients

Figure S3. Comparison of cell-free DNA concentrations extracted from paired

serum and plasma samples

Figure S4. Comparison of variant allele frequencies in cell-free DNAs extracted from paired serum and plasma samples

Figure S5. Sequencing analysis pipelines

## **Supplementary methods**

### **Timing of sample collection**

Among 9 patients, whose cell-free DNAs (cfDNAs) were analyzed in targeted sequencing of 8 genes, only one patient (IVL4) had received 28 days of corticosteroid therapy prior to blood sample collection (Figure S4). Samples were collected at the timing of relapse in one patient (IVL5), when 3 years had passed since last chemotherapy including corticosteroid. The other cases did not receive any corticosteroid therapy before the first blood samples preservation. In four patients, samples were additionally preserved during the courses of chemotherapy (Figure 2A-D).

### **DNA extractions and analysis**

Tissue-derived DNAs (tdDNAs) were extracted from archived formalin-fixed paraffin-embedded (FFPE) specimens and/or cryo-preserved bone marrow samples, in which the existence of lymphoma cells had been pathologically confirmed, using GeneRead FFPE kit (Qiagen) and/or Gentra Puregene Blood Kit (Qiagen), respectively.

Paired reference genomic DNAs (gDNAs) were extracted from buccal cells or archived FFPE specimens in which the absence of lymphoma cells had been pathologically confirmed using a DNA mini kit (Qiagen) and/or GeneRead FFPE kit (Qiagen). Three to 4 sections of each FFPE specimen were sliced at 10-micrometer thickness for DNA extraction. The cfDNAs were extracted from 1 ml of serum or plasma, obtained at various time points (e.g., prior to chemotherapy, at complete remission, at relapse), using a QIAamp circulating nucleic acid kit (Qiagen). The serum and plasma were separated within 3 and 6 hours, respectively, after blood collection. Blood samples were collected into tubes with serum separator or tubes with heparin and centrifuged at 1750×g for 15 minutes at room temperature. Serum and plasma were transferred into cryogenic vials (Corning) at -80°C until DNA extraction. Quantification of the extracted DNAs was performed using a Qubit fluorometer (Thermo Fisher Scientific) or Nanodrop (ThermoFisher Scientific). A Qubit dsDNA HS Assay Kit was used for tdDNAs from FFPE specimens and cfDNAs. Extracted DNAs were stored at -20°C until analysis. Kits were performed according to the manufacturer's instructions.

## **Primer designs, constructing libraries, and variant calling pipelines in targeted sequencing**

The Ion Ampliseq Custom DNA panel for 8 genes of coding sequences and its flanking regions was designed using online Ion Ampliseq Designer (Thermo Fisher Scientific).

The gene panel consisted of 162 amplicons, with sizes ranging from 125 to 175bp,

totaling 16.21 kilo-bases. Coverage of all targeted regions was 90.1%. Libraries were

prepared using an Ion Ampliseq Library Kit 2.0 (Thermo Fisher Scientific). A median

of 2.6 ng (range, 0.57-3.0 ng) of DNA was amplified by multiplex polymerase chain

reaction (PCR) according to the manufacturer's instructions. Sequencing of cfDNAs

and paired reference gDNAs to  $\geq 100\times$  coverage and tdDNA samples to  $\geq 500\times$

coverage was planned because preliminary results indicated that variant allele

frequencies (VAFs) in cfDNAs were higher than those in tdDNAs. Torrent Suite

version 5.2.2 (Thermo Fisher Scientific) software was used to perform signal processing,

base calling, and sequence alignment to the reference genome (hg19), and the Binary

Alignment Map (BAM) files were generated. The Tumor-Normal pair workflow of Ion

Reporter Software version 5.6 (Thermo Fisher Scientific) was used to call somatic

mutations by uploading paired BAM files of cfDNA samples and reference gDNA samples plus those of tdDNA samples and reference gDNA samples (Figure S3). With IVL23, which had no paired reference gDNA sample, we used single sample workflow by uploading BAM files for cfDNA and tdDNA samples as an exception. In the Ion Reporter Software, the filters to call variants were set as follows: (1) P value  $\leq 0.012 (5 \times 10^{-6})$ ; (2) Allele read count  $\geq 4$ ; (3) Variant allele frequencies  $\geq 10\%$ ; (4) Exclude synonymous SNV. As for (1), the workflow performed a statistical evaluation of the probability that the cfDNA or tdDNA variant allele was not present in the paired reference DNA and calculated a P-value representing the statistical confidence of the variant call. After completing the filtering, all somatic variants were validated by Sanger sequencing. Validated variants in cfDNA samples were explored in tdDNA samples by single sample workflow with the VAF filter turned down to 1%. The same procedure was applied for validated variants in tdDNA.

### **Sanger Sequencing**

In order to obtain amplicons of interest, PCR was performed using KOD Plus Neo (Toyobo) or Amplitaq Gold 360 Master Mix (Thermo Fisher Scientific) according to

the manufacturer's instructions. The median amount of input DNA was 10 ng (range, 2.7-10.0 ng). Sanger Sequencing was performed using a BigDye Terminator v3.1 Cycle Sequencing Kit (Thermo Fisher Scientific) and ABI 3130xl genetic analyzer (Thermo Fisher Scientific). The used primers are listed in Table S9.

### **Longitudinal analysis of cfDNA**

To evaluate the utility of cfDNA analysis in assisting diagnosis and a monitoring context, we sequenced known variants for serial cfDNAs in each patient. Used primers are listed in Table S10. Libraries were constructed using the Ion Plus Fragment Library kit (Thermo Fisher Scientific) according to the manufacturer's instructions.

### **Comparison analysis of cfDNAs extracted from paired serum and plasma samples**

To assess the impact of the different cfDNA source (serum or plasma), we sequenced known variants for 6 pairs of cfDNAs extracted from paired serum and plasma samples in 3 patients (IVL2, IVL4, and IVL5). Used primers are listed in Table S10. Libraries were constructed in the same way as longitudinal analysis.



### **Droplet digital PCR analysis**

Pre-designed primers and TaqMan probes with FAM and HEX were used for the detection of c.794T>C (L265P) *MYD88* variant (Bio-Rad, Assay ID: dHsaMDS2516944). Distilled water controls were run to check contamination and background probe signals. The assay was performed using the QX200 droplet digital PCR system (Bio-Rad). PCR amplification was performed as follows: initial enzyme activation at 95°C for 10 minutes, 40 cycles of denaturation and annealing/extension at 94°C for 30 seconds, hold at 56°C for 1 minute, and then enzyme deactivation at 98°C for 10 minutes. The ramp rate was at 2°C/second throughout the entire amplification process. Results were analyzed using QuantaSoft version 1.7.4. (Bio-Rad). Sensitivity thresholds were established by a dilution study with the lower limit of quantification and that of detection found to be 0.025% and 0.006% with a fractional abundance of 0.1% and 0.07%<sup>1</sup>.

### **Statistical analysis**

Statistical analysis was performed with EZR version 1.3.2.<sup>2</sup>. Paired t-test was used to

compare VAFs, and concentrations of cfDNA in paired samples. The enrichment and significance value of *PIMI* variants for the motif (WRCY), transition, and C:G base specific SNVs were calculated by Fisher's exact test (Table S7) as previously reported<sup>3</sup>. All *P* values were calculated by two-sided testing. The difference was considered statistically significant when the *P* value was less than 0.05.

#### **Supplementary References**

1. Hattori K, Sakata-Yanagimoto M, Suehara Y, et al. Clinical significance of disease-specific MYD88 mutations in circulating DNA in primary central nervous system lymphoma. *Cancer science*. 2018;109(1):225-230.
2. Kanda Y. Investigation of the freely available easy-to-use software 'EZR' for medical statistics. *Bone marrow transplantation*. 2013;48(3):452-458.
3. Khodabakhshi AH, Morin RD, Fejes AP, et al. Recurrent targets of aberrant somatic hypermutation in lymphoma. *Oncotarget*. 2012;3(11):1308-1319.

Table S1. List of genes sequenced in targeted sequencing

| Gene           | Transcript reference | Location    | References                                             |
|----------------|----------------------|-------------|--------------------------------------------------------|
| <i>B2M</i>     | NM_004048            | 15q21–q22.2 | Challa–Malladi, Cancer Cell, 2011; Morin, Nature, 2011 |
| <i>BTG2</i>    | NM_006763            | 1q32        | Morin, Nature, 2011                                    |
| <i>CARD11</i>  | NM_032415            | 7p22        | Lenz, Science, 2008; Davis, Nature, 2010               |
| <i>CD79B</i>   | NM_000626            | 17q23       | Davis, Nature, 2010                                    |
| <i>MYD88</i>   | NM_002468            | 3p22        | Ngo, Nature, 2011                                      |
| <i>PIM1</i>    | NM_002648            | 6p21.2      | Pasqualucci, Nature, 2001                              |
| <i>PRDM1</i>   | NM_1198              | 6q21–q22.1  | Pasqualucci, JEM, 2006                                 |
| <i>TNFAIP3</i> | NM_001270507         | 6q23        | Compagno, Nature, 2009                                 |



| IVL13                 | IVL15                                   | IVL16     | IVL17                  | IVL18                | IVL19                 | IVL20          | IVL21                  | IVL22          | IVL23                                        | IVL24         | IVL25     | IVL26            | IVL27                |
|-----------------------|-----------------------------------------|-----------|------------------------|----------------------|-----------------------|----------------|------------------------|----------------|----------------------------------------------|---------------|-----------|------------------|----------------------|
| 74, M                 | 65, M                                   | 79, F     | 71, F                  | 46, F                | 62, F                 | 74, M          | 76, F                  | 61, M          | 72, F                                        | 74, F         | 71, F     | 88, M            | 57, F                |
| +                     | +                                       | +         | +                      | -                    | +                     | +              | +                      | +              | +                                            | +             | +         | +                | +                    |
| loss of consciousness | gait disturbance, cauda equina syndrome | -         | -                      | -                    | loss of consciousness | -              | -                      | convulsion     | -                                            | confusion     | confusion | gait disturbance | -                    |
| -                     | -                                       | -         | fatigue, appetite loss | incidental           | -                     | cough, dyspnea | fatigue, appetite loss | -              | cough                                        | appetite loss | dyspnea   | -                | diarrhea, arthralgia |
| 86                    | 92                                      | 95        | 96                     | 98                   | 95                    | 94             | NA                     | NA             | 93                                           | 87            | NA        | NA               | 95                   |
| -                     | -                                       | -         | +                      | -                    | -                     | +              | +                      | -              | -                                            | -             | -         | +                | -                    |
| +                     | -                                       | +         | -                      | +                    | +                     | -              | +                      | +              | +                                            | +             | +         | -                | -                    |
| +                     | -                                       | +         | +                      | -                    | -                     | -              | +                      | -              | -                                            | +             | +         | -                | +                    |
| +                     | +                                       | +         | -                      | -                    | +                     | +              | +                      | -              | -                                            | +             | +         | +                | +                    |
| 1255                  | 1044                                    | 875       | 490                    | 268                  | 316                   | 1764           | 223                    | 341            | 699                                          | 1205          | 773       | 381              | 1090                 |
| 2800                  | 1740                                    | 22100     | 13883                  | 5090                 | 4205                  | 2870           | 10200                  | 1433           | 4739                                         | 5234          | 8924      | 2679             | 25012                |
| 10.04                 | 14.36                                   | 15.86     | 1.16                   | 3.32                 | 22.02                 | 3.8            | 10.2                   | 0.7            | 10.01                                        | 13.88         | 9.55      | 2.9              | 20.65                |
| 1.8                   | 2.3                                     | 1.3       | 2.9                    | 3                    | 1.9                   | 3.4            | 1.4                    | 1.7            | 2.1                                          | 2.9           | 2         | 3                | 2.5                  |
| +                     | -                                       | +         | dry tap                | -                    | (-)→(+)               | -              | -                      | -              | +                                            | +             | -         | (-)→(-)          | +                    |
| +                     | -                                       | +         | +                      | -                    | (-)→(+)               | (-)→(+)        | +                      | +              | +                                            | +             | -         | (-)→(+)          | +                    |
| NA                    | +                                       | NA        | NA                     | NA                   | NA                    | -              | +                      | +              | +                                            | +             | +         | (-)→(+)          | +                    |
| NA                    | NA                                      | liver (+) | NA                     | uterus (+), lung (+) | brain (+)             | lung (+)       | NA                     | NA             | heart (+), mediastinal LN (+)                | NA            | NA        | NA               | NA                   |
| NA                    | NA                                      | NA        | NA                     | NA                   | NA                    | negative       | NA                     | adrenal glands | heart, lungs, adrenal glands, mediastinal LN | liver, spleen | lungs     | negative         | BM, liver, spleen    |
| +                     | -                                       | +         | +                      | -                    | -                     | -              | +                      | -              | -                                            | -             | +         | +                | +                    |
| -                     | -                                       | -         | -                      | -                    | -                     | +              | -                      | -              | -                                            | -             | -         | +                | -                    |

| IVL28                 | IVL29                         |
|-----------------------|-------------------------------|
| 61, F                 | 81, M                         |
| +                     | +                             |
| -                     | loss of consciousness         |
| arthralgia            | fatigue                       |
| 91                    | 98                            |
| -                     | +                             |
| +                     | +                             |
| +                     | +                             |
| +                     | +                             |
| 5199                  | 511                           |
| 10769                 | 8998                          |
| 22.47                 | 4.39                          |
| 2.3                   | 2.6                           |
| -                     | +                             |
| +                     | +                             |
| -                     | +                             |
| NA                    | NA                            |
| BM, liver, dura mater | BM, sternal bone, rib, spleen |
| +                     | +                             |
| -                     | -                             |

†WBC count < 4000/ $\mu$ L; ‡Hemoglobin < 11g/dl; \*Platelet count <  $10 \times 10^4$ / $\mu$ L; § Diagnosis was based on HLH 2004 criteria; F, Female; M, Male; NA, not available; BM, bone marrow; LN, lymph node; CNS, central nervous system; +, positive; -, negative

Table S3. Results of immunohistochemistry

| ID    | Specimen         | Immunohistochemistry |      |       | Hans classification |
|-------|------------------|----------------------|------|-------|---------------------|
|       |                  | CD10                 | BCL6 | MUM-1 |                     |
| IVL1  | breast           | -                    | -    | +     | non-GCB             |
| IVL2  | skin             | -                    | -    | +     | non-GCB             |
| IVL3  | skin             | NA                   | NA   | NA    | NA                  |
| IVL4  | skin             | NA                   | NA   | NA    | NA                  |
| IVL5  | skin             | -                    | NA   | +     | non-GCB             |
| IVL6  | skin             | -                    | -    | +     | non-GCB             |
| IVL7  | skin             | -                    | +    | +     | non-GCB             |
| IVL8  | lung             | -                    | +    | +     | non-GCB             |
| IVL9  | brain            | -                    | +    | +     | non-GCB             |
| IVL10 | skin             | -                    | +    | +     | non-GCB             |
| IVL11 | mesentery        | -                    | -    | +     | non-GCB             |
| IVL13 | bone marrow clot | NA                   | NA   | NA    | NA                  |
| IVL15 | skin             | -                    | +    | +     | non-GCB             |
| IVL16 | bone marrow clot | -                    | +    | +     | non-GCB             |
| IVL17 | bone marrow      | -                    | +    | +     | non-GCB             |
| IVL18 | lung             | -                    | -    | +     | non-GCB             |
| IVL19 | brain            | -                    | +    | +     | non-GCB             |
| IVL20 | lung             | -                    | +    | +     | non-GCB             |
| IVL21 | bone marrow      | -                    | +    | +     | non-GCB             |
| IVL22 | skin             | NA                   | +    | +     | NA                  |
| IVL23 | skin             | -                    | -    | NA    | non-GCB             |
| IVL24 | skin             | -                    | +    | +     | non-GCB             |
| IVL25 | skin             | -                    | +    | +     | non-GCB             |
| IVL26 | skin/bone marrow | NA                   | NA   | NA    | NA                  |
| IVL27 | bone marrow      | -                    | NA   | +     | non-GCB             |
| IVL28 | lung             | -                    | +    | +     | non-GCB             |
| IVL29 | skin             | NA                   | NA   | NA    | NA                  |

NA, not available; non-GCB, non-germinal center B-type; +, positive; -, negative

Table S4. Concentration of cell-free DNA

|                                                                                                              | ID               | Event              | Sample collection<br>(counted from the<br>day of diagnosis) | Prior<br>chemotherapy | Prior glucocorticoid       | Concentration<br>(ng/ml) | Sample |
|--------------------------------------------------------------------------------------------------------------|------------------|--------------------|-------------------------------------------------------------|-----------------------|----------------------------|--------------------------|--------|
| Samples for<br>targeted<br>sequencing<br>(8 genes)                                                           | IVL2             | Diagnosis          | day 0                                                       | no                    | no                         | 147                      | plasma |
|                                                                                                              | IVL3             | Diagnosis          | day 0                                                       | no                    | no                         | 2900                     | plasma |
|                                                                                                              | IVL4             | Diagnosis          | day 0                                                       | no                    | yes (since 28 days before) | 179                      | plasma |
|                                                                                                              | IVL5             | Relapse (IVLBCL)   | day 1022                                                    | yes (3 years ago)     | yes (3 years ago)          | 157                      | plasma |
|                                                                                                              | IVL6             | Diagnosis          | day 0                                                       | no                    | no                         | 56.7                     | plasma |
|                                                                                                              | IVL21            | Diagnosis          | day 0                                                       | no                    | no                         | 211.7                    | serum  |
|                                                                                                              | IVL23            | Diagnosis          | day 0                                                       | no                    | no                         | 666.7                    | serum  |
|                                                                                                              | IVL24            | Diagnosis          | day 0                                                       | no                    | no                         | 2170                     | serum  |
|                                                                                                              | IVL25            | Diagnosis          | day 0                                                       | no                    | no                         | 422.5                    | serum  |
| Samples for<br>longitudinal<br>analysis/<br>Samples for<br>comparative<br>analysis of<br>serum and<br>plasma | IVL1             | Complete remission | day 496                                                     | yes                   | yes                        | 30.7                     | serum  |
|                                                                                                              | IVL1             | Regular visits     | day 852                                                     | yes                   | yes                        | 67.5                     | serum  |
|                                                                                                              | IVL1             | Regular visits     | day 908                                                     | yes                   | yes                        | 79.5                     | serum  |
|                                                                                                              | IVL1             | Regular visits     | day 971                                                     | yes                   | yes                        | 69.5                     | serum  |
|                                                                                                              | IVL1             | Regular visits     | day 999                                                     | yes                   | yes                        | 88                       | serum  |
|                                                                                                              | IVL1             | Relapse (cecum)    | day 1033                                                    | yes                   | yes                        | 88.5                     | serum  |
|                                                                                                              | IVL2             | Before diagnosis   | day -117                                                    | no                    | no                         | 189                      | serum  |
|                                                                                                              | IVL2             | Before diagnosis   | day -101                                                    | no                    | no                         | 68                       | serum  |
|                                                                                                              | IVL2             | Before diagnosis   | day -84                                                     | no                    | no                         | 19.1                     | serum  |
|                                                                                                              | IVL2             | Before diagnosis   | day -7                                                      | no                    | no                         | 185.5                    | serum  |
|                                                                                                              | IVL2             | Before diagnosis   | day -7                                                      | no                    | no                         | 73.2                     | plasma |
|                                                                                                              | IVL2             | Before diagnosis   | day -3                                                      | no                    | no                         | 169                      | serum  |
|                                                                                                              | IVL2             | Before diagnosis   | day -3                                                      | no                    | no                         | 83.1                     | plasma |
|                                                                                                              | IVL2             | Diagnosis          | day 0                                                       | no                    | no                         | 515                      | serum  |
|                                                                                                              | IVL2             | Complete remission | day 168                                                     | yes                   | yes                        | 22.25                    | serum  |
|                                                                                                              | IVL2             | Regular visits     | day 512                                                     | yes                   | yes                        | 25.2                     | serum  |
|                                                                                                              | IVL4             | Before diagnosis   | day -5                                                      | no                    | yes (since 23 days before) | 207.5                    | serum  |
|                                                                                                              | IVL4             | Before diagnosis   | day -5                                                      | no                    | yes (since 23 days before) | 58.1                     | plasma |
|                                                                                                              | IVL4             | Before diagnosis   | day -3                                                      | no                    | yes (since 25 days before) | 189                      | serum  |
|                                                                                                              | IVL4             | Before diagnosis   | day -3                                                      | no                    | yes (since 25 days before) | 70.6                     | plasma |
|                                                                                                              | IVL5             | Complete remission | day 742                                                     | yes                   | yes                        | 80                       | serum  |
|                                                                                                              | IVL5             | Regular visits     | day 805                                                     | yes                   | yes                        | 44.15                    | serum  |
|                                                                                                              | IVL5             | Regular visits     | day 944                                                     | yes                   | yes                        | 490                      | serum  |
|                                                                                                              | IVL5             | Relapse (IVLBCL)   | day 1005                                                    | yes                   | yes                        | 423                      | serum  |
| IVL5                                                                                                         | Relapse (IVLBCL) | day 1005           | yes                                                         | yes                   | 295                        | plasma                   |        |
| IVL6                                                                                                         | Regular visits   | day 208            | yes                                                         | yes                   | 81.5                       | serum                    |        |
| IVL6                                                                                                         | Regular visits   | day 271            | yes                                                         | yes                   | 116.5                      | serum                    |        |
| IVL6                                                                                                         | Regular visits   | day 341            | yes                                                         | yes                   | 89                         | serum                    |        |
| IVL6                                                                                                         | Relapse (CNS)    | day 393            | yes                                                         | yes                   | 93.5                       | serum                    |        |

IVLBCL, intravascular large B-cell lymphoma; CNS, central nervous system



Table S5. List of variants in targeted sequencing

| Position (hg19) | variant classification     | VAF_<br>cfDNA<br>(%) | VAF_<br>tdDNA<br>(%) | genes        | Ref. | Var. | COSMIC      | dbSNP       | Exon | cDNA change    | Protein<br>change | coverage<br>_cfDNA | coverage<br>_tdDNA | ID    |
|-----------------|----------------------------|----------------------|----------------------|--------------|------|------|-------------|-------------|------|----------------|-------------------|--------------------|--------------------|-------|
| chr3:38182641   | nonsynonymous SNV          | 46.18                | 5.2                  | <i>MYD88</i> | T    | C    | COSM85940   | rs387907272 | 5    | c.794T>C       | p.Leu265Pro       | 1047               | 3526               | IVL2  |
| chr6:106553712  | Stop gain                  | 54.82                | 2.6                  | <i>PRDM1</i> | C    | A    | -           | -           | 5    | c.1677C>A      | p.Tyr559Ter       | 197                | 2269               | IVL2  |
| chr6:37138644   | nonsynonymous SNV          | 41.53                | 6.5                  | <i>PIM1</i>  | G    | A    | -           | -           | 2    | c.178G>A       | p.Asp60Asn        | 118                | 356                | IVL2  |
| chr6:37138925   | nonsynonymous SNV          | 41.07                | 2.4                  | <i>PIM1</i>  | G    | A    | -           | -           | 4    | c.265G>A       | p.Glu89Lys        | 56                 | 352                | IVL2  |
| chr6:37139110   | nonframeshift substitution | 52.83                | 4                    | <i>PIM1</i>  | GG   | AA   | -           | -           | 4    | c.450_451GG>AA | p.Val151Met       | 265                | 2768               | IVL2  |
| chr1:203274762  | nonsynonymous SNV          | 14.15                | no call              | <i>BTG2</i>  | C    | G    | -           | -           | 1    | c.28C>G        | p.Leu10Val        | 424                | 3010               | IVL21 |
| chr3:38182641   | nonsynonymous SNV          | 26.73                | no call              | <i>MYD88</i> | T    | C    | COSM85940   | rs387907272 | 5    | c.794T>C       | p.Leu265Pro       | 549                | 9372               | IVL21 |
| chr6:37138761   | nonsynonymous SNV          | 20.61                | no call              | <i>PIM1</i>  | C    | A    | -           | -           | 3    | c.194C>A       | p.Ala65Asp        | 427                | 2248               | IVL21 |
| chr6:37139045   | nonsynonymous SNV          | 45.45                | no call              | <i>PIM1</i>  | C    | T    | -           | -           | 4    | c.385C>T       | p.Leu129Phe       | 11                 | 1950               | IVL21 |
| chr6:37139098   | nonsynonymous SNV          | 12.35                | no call              | <i>PIM1</i>  | C    | A    | -           | -           | 4    | c.438C>A       | p.Ser146Arg       | 429                | 5174               | IVL21 |
| chr6:37140800   | nonsynonymous SNV          | 21.44                | no call              | <i>PIM1</i>  | G    | A    | -           | -           | 5    | c.636G>A       | p.Trp212Ter       | 1617               | 14392              | IVL21 |
| chr17:62006799  | nonsynonymous SNV          | 70.96                | no call              | <i>CD79B</i> | A    | G    | COSM220734  | -           | 5    | c.586T>C       | p.Tyr196His       | 834                | 5101               | IVL23 |
| chr3:38182641   | nonsynonymous SNV          | 70.18                | no call              | <i>MYD88</i> | T    | C    | COSM85940   | rs387907272 | 5    | c.794T>C       | p.Leu265Pro       | 1054               | 9814               | IVL23 |
| chr6:37138804   | nonsynonymous SNV          | 45.08                | no call              | <i>PIM1</i>  | G    | C    | COSM220741  | -           | 3    | c.237G>C       | p.Glu79Asp        | 578                | 4193               | IVL23 |
| chr6:37138950   | nonsynonymous SNV          | 19.12                | no call              | <i>PIM1</i>  | G    | A    | COSM220740  | rs562319987 | 4    | c.290G>A       | p.Ser97Asn        | 68                 | 1069               | IVL23 |
| chr1:203274817  | nonsynonymous SNV          | 18.66                | 6.4                  | <i>BTG2</i>  | G    | A    | COSM5946364 | rs55906353  | 1    | c.83G>A        | p.Gly28Asp        | 418                | 4139               | IVL24 |
| chr17:62006799  | nonsynonymous SNV          | 22.72                | 5.7                  | <i>CD79B</i> | A    | G    | COSM220734  | -           | 5    | c.586T>C       | p.Tyr196His       | 625                | 5994               | IVL24 |
| chr3:38182641   | nonsynonymous SNV          | 31.24                | 7.8                  | <i>MYD88</i> | T    | C    | COSM85940   | rs387907272 | 5    | c.794T>C       | p.Leu265Pro       | 813                | 10142              | IVL24 |
| chr6:37138804   | nonsynonymous SNV          | 28.34                | 5.9                  | <i>PIM1</i>  | G    | C    | COSM220741  | -           | 3    | c.237G>C       | p.Glu79Asp        | 437                | 3871               | IVL24 |
| chr6:37138955   | nonsynonymous SNV          | 33.09                | 8.9                  | <i>PIM1</i>  | G    | A    | -           | -           | 4    | c.295G>A       | p.Gly99Ser        | 136                | 940                | IVL24 |
| chr6:37139097   | nonsynonymous SNV          | 20.82                | 4.8                  | <i>PIM1</i>  | G    | A    | -           | -           | 4    | c.437G>A       | p.Ser146Asn       | 293                | 4082               | IVL24 |
| chr6:37139150   | nonsynonymous SNV          | 41.3                 | 9.6                  | <i>PIM1</i>  | C    | T    | COSM220738  | -           | 4    | c.490C>T       | p.Leu164Phe       | 293                | 4089               | IVL24 |
| chr17:62006799  | nonsynonymous SNV          | 50                   | 3.3                  | <i>CD79B</i> | A    | G    | COSM220734  | -           | 5    | c.586T>C       | p.Tyr196His       | 322                | 1287               | IVL25 |
| chr3:38182641   | nonsynonymous SNV          | 49.07                | 1.3                  | <i>MYD88</i> | T    | C    | COSM85940   | rs387907272 | 5    | c.794T>C       | p.Leu265Pro       | 222                | 1899               | IVL25 |
| chr6:106554273  | nonsynonymous SNV          | 38.1                 | no call              | <i>PRDM1</i> | C    | T    | -           | -           | 6    | c.1801C>T      | p.Arg601Trp       | 735                | 2745               | IVL3  |
| chr17:62006798  | nonsynonymous SNV          | 40.57                | no call              | <i>CD79B</i> | T    | C    | COSM220736  | -           | 5    | c.587A>G       | p.Tyr196Cys       | 838                | 3440               | IVL4  |
| chr6:37138805   | nonsynonymous SNV          | 38.5                 | no call              | <i>PIM1</i>  | C    | A    | COSM5948425 | -           | 3    | c.238C>A       | p.Leu80Met        | 813                | 3607               | IVL4  |
| chr17:62006798  | nonsynonymous SNV          | 84.03                | 4.6                  | <i>CD79B</i> | T    | C    | COSM220736  | -           | 5    | c.587A>G       | p.Tyr196Cys       | 744                | 2108               | IVL5  |
| chr6:106543541  | nonsynonymous SNV          | 77.41                | 3.7                  | <i>PRDM1</i> | C    | A    | -           | -           | 3    | c.343C>A       | p.Pro115Thr       | 239                | 3107               | IVL5  |
| chr17:62006680  | nonsynonymous SNV          | 53.35                | 1.5                  | <i>CD79B</i> | A    | G    | COSM1737940 | -           | 6    | c.596T>C       | p.Leu199Pro       | 1015               | 3457               | IVL6  |
| chr6:106552836  | Stop gain                  | 41.2                 | 1.9                  | <i>PRDM1</i> | C    | A    | -           | -           | 5    | c.801C>A       | p.Tyr267Ter       | 267                | 2472               | IVL6  |
| chr6:37138805   | nonsynonymous SNV          | 34.36                | no call              | <i>PIM1</i>  | C    | G    | -           | -           | 3    | c.238C>G       | p.Leu80Val        | 806                | 2350               | IVL6  |
| chr6:37139111   | nonsynonymous SNV          | 27.44                | no call              | <i>PIM1</i>  | G    | C    | -           | -           | 4    | c.451G>C       | p.Val151Leu       | 696                | 2758               | IVL6  |

VAF, Variant allele frequencies; SNV, single nucleotide variation; MNV, multiple nucleotide variation; Ref., Reference allele; Var., Variant allele; cfDNA, cell-free DNA; tdDNA, tissue-derived DNA

Table S6. Coverage analysis of targeted regions

| ID    | target region coverage         |                                |                                      |
|-------|--------------------------------|--------------------------------|--------------------------------------|
|       | $\geq \times 100$ in cfDNA (%) | $\geq \times 500$ in tdDNA (%) | $\geq \times 100$ in normal gDNA (%) |
| IVL2  | 83.8                           | 85.13                          | 89.14                                |
| IVL3  | 86                             | 86.54                          | 83.14                                |
| IVL4  | 85.38                          | 86.4                           | 89.03                                |
| IVL5  | 86.55                          | 87.97                          | 89.62                                |
| IVL6  | 88.21                          | 87.69                          | 88.98                                |
| IVL21 | 87.63                          | 90.47                          | 91.54                                |
| IVL23 | 88.45                          | 90.6                           | NA                                   |
| IVL24 | 88.81                          | 89.51                          | 91.03                                |
| IVL25 | 78.26                          | 82.88                          | 90.27                                |

cfDNA, cell-free DNA; tdDNA, tissue-derived DNA; gDNA, genomic DNA; NA, not available

Table S7. Three measures indicating aberrant somatic hypermutations in *PIM1*

| Mutation enrichment in WRCY ( <i>P</i> value) | Mutation enrichment in transition ( <i>P</i> value) | Mutation enrichment in C:G ( <i>P</i> value) |
|-----------------------------------------------|-----------------------------------------------------|----------------------------------------------|
| 3.18 (0.0005)                                 | 1.29 (0.285)                                        | 1.68 (0.0004)                                |

The variation enrichment value was calculated as previously reported (supplementary reference 2). WRCY, W denotes A or T, R denotes A or G, Y denotes C or T.

Table S8. Results of droplet digital PCR for L265P *MYD88* mutation

| ID    | <i>MYD88</i> L265P variant allele frequency (%) |              |      |        |
|-------|-------------------------------------------------|--------------|------|--------|
|       | BM                                              | serum/plasma | skin | others |
| IVL1  | 0.00                                            | NA           | 0.68 | NA     |
| IVL2  | 1.74                                            | 42.58        | 5.01 | NA     |
| IVL3  | 0.00                                            | 0.00         | 0.00 | NA     |
| IVL4  | 0.00                                            | 0.00         | 0.00 | NA     |
| IVL5  | 0.00                                            | 0.00         | NA   | NA     |
| IVL6  | 0.00                                            | 0.00         | NA   | NA     |
| IVL7  | 0.00                                            | NA           | 0.00 | NA     |
| IVL8  | 0.00                                            | NA           | 0.00 | 0.00   |
| IVL9  | NA                                              | NA           | NA   | 4.68   |
| IVL10 | 0.00                                            | NA           | 0.00 | NA     |
| IVL11 | NA                                              | NA           | NA   | 9.09   |
| IVL13 | 0.00                                            | NA           | NA   | NA     |
| IVL15 | NA                                              | NA           | 0.00 | NA     |
| IVL16 | 13.28                                           | NA           | NA   | NA     |
| IVL17 | 14.51                                           | NA           | NA   | NA     |
| IVL18 | NA                                              | NA           | NA   | 34.76  |
| IVL19 | NA                                              | NA           | NA   | 2.58   |
| IVL20 | NA                                              | NA           | NA   | 10.04  |
| IVL21 | NA                                              | 34.92        | 0.72 | NA     |
| IVL22 | NA                                              | 0.00         | NA   | NA     |
| IVL23 | 0.61                                            | 81.33        | 0.82 | NA     |
| IVL24 | 11.81                                           | 26.69        | 7.64 | NA     |
| IVL25 | NA                                              | 60.98        | 2.03 | NA     |
| IVL26 | 0.21                                            | NA           | NA   | NA     |
| IVL27 | 0.00                                            | NA           | NA   | NA     |
| IVL28 | 9.31                                            | NA           | NA   | NA     |
| IVL29 | NA                                              | NA           | 0.34 | NA     |

BM, bone marrow; NA, not available

Table S9. Primers used for Sanger sequencing

| Name       |         | Sequence (5'-3')        |
|------------|---------|-------------------------|
| MYD88_4    | Forward | TGCCAGGGGTACTTAGATGG    |
|            | Reverse | GCGAGTCCAGAACCAAGATT    |
| CD79B_9    | Forward | CCAACCACACCAGCAGATAG    |
|            | Reverse | GCTGTTCTTGCAGAATGCAC    |
| CD79B_11   | Forward | GGTGCTCACCTACAGACCACT   |
|            | Reverse | TGGGGGACACTAACACTCTG    |
| BTG2_1     | Forward | GCCAGGGTAACGCTGTCTT     |
|            | Reverse | CTCACCTGTGAGTGCCTCCT    |
| PRDM1_2-5  | Forward | TGAAGGACAAGGCCTGTAGC    |
|            | Reverse | GCAAACGTTGCATTCGTA CTT  |
| PRDM1_3-2  | Forward | CAACACTTGAGTCTTGGAGCAG  |
|            | Reverse | CCAGAAAATACTGCGCACCT    |
| PRDM1_5-14 | Forward | TCCTGTTTAGGTTATTGGAGTGA |
|            | Reverse | GGGGATGCTGGATACTTATGG   |
| PRDM1_6-12 | Forward | TTCAGCACAAACACAGAGCA    |
|            | Reverse | GTCTCTCGATCCCGTAGGC     |
| TNFAIP3_1  | Forward | AGAAATGGCAGGAAAACAGC    |
|            | Reverse | AAGGGCTCATAGGCTTCTCC    |
| PIM1_long1 | Forward | CACTGAGTCCCCGTGCTT      |
|            | Reverse | ACTCACCAGCTCTCCCCAGT    |
| PIM1_long3 | Forward | TCATTAGGCTCCTGGACTGG    |
|            | Reverse | TCACCATCGAAGTCCGTGTA    |
| PIM1_long4 | Forward | TCCACTCTCCTTAGCCCAGA    |
|            | Reverse | CCCCTGATGATCTCTTCGTC    |
| PIM1_long5 | Forward | GCTGAAAGCAGACTGGAGGA    |
|            | Reverse | GGCAGGAGAACATCTTGCAT    |
| PIM1_long6 | Forward | CATCAAACACGTGGAGAAGG    |
|            | Reverse | TTCCGTGATGAAGTCGAAGA    |

Table S10. Primers used for longitudinal analysis and comparing serum/plasma analysis

| Name       |         | Sequence (5'-3')                  |
|------------|---------|-----------------------------------|
| MYD88_2    | Forward | ACTGGGCTTGTCCCACCAT               |
|            | Reverse | TCGCAGACAGTGATGAACCT              |
| CD79B_1    | Forward | GCAGCGTCACTATGTCCTCA              |
|            | Reverse | CTGAGTCCTCGGGGTCAGT               |
| CD79B_3    | Forward | CCAACCACACCAGCAGATAG              |
|            | Reverse | CCCCAGGATGACAGCAAG                |
| PIM1_2-4   | Forward | GGAGCCCTGCAAGAGGAG                |
|            | Reverse | GCGATTGAGGTCGATAAGGA              |
| PRDM1_2-1  | Forward | AGCCCAAAGCTACCTCAGC               |
|            | Reverse | GCAAACGTTGCATTCTACT               |
| PRDM1_5-11 | Forward | TTTTTCCTGTTTAGGTTATTGGAGTGA       |
|            | Reverse | TAACATTTAATGGGTCTGAAGAAATTTCCCTTA |
| PRDM1_6-9  | Forward | ACTCTGCCCAAAGAATGTCC              |
|            | Reverse | GGGCTCCCACGTCTTCTAA               |

Figure S1. Workflow of the study

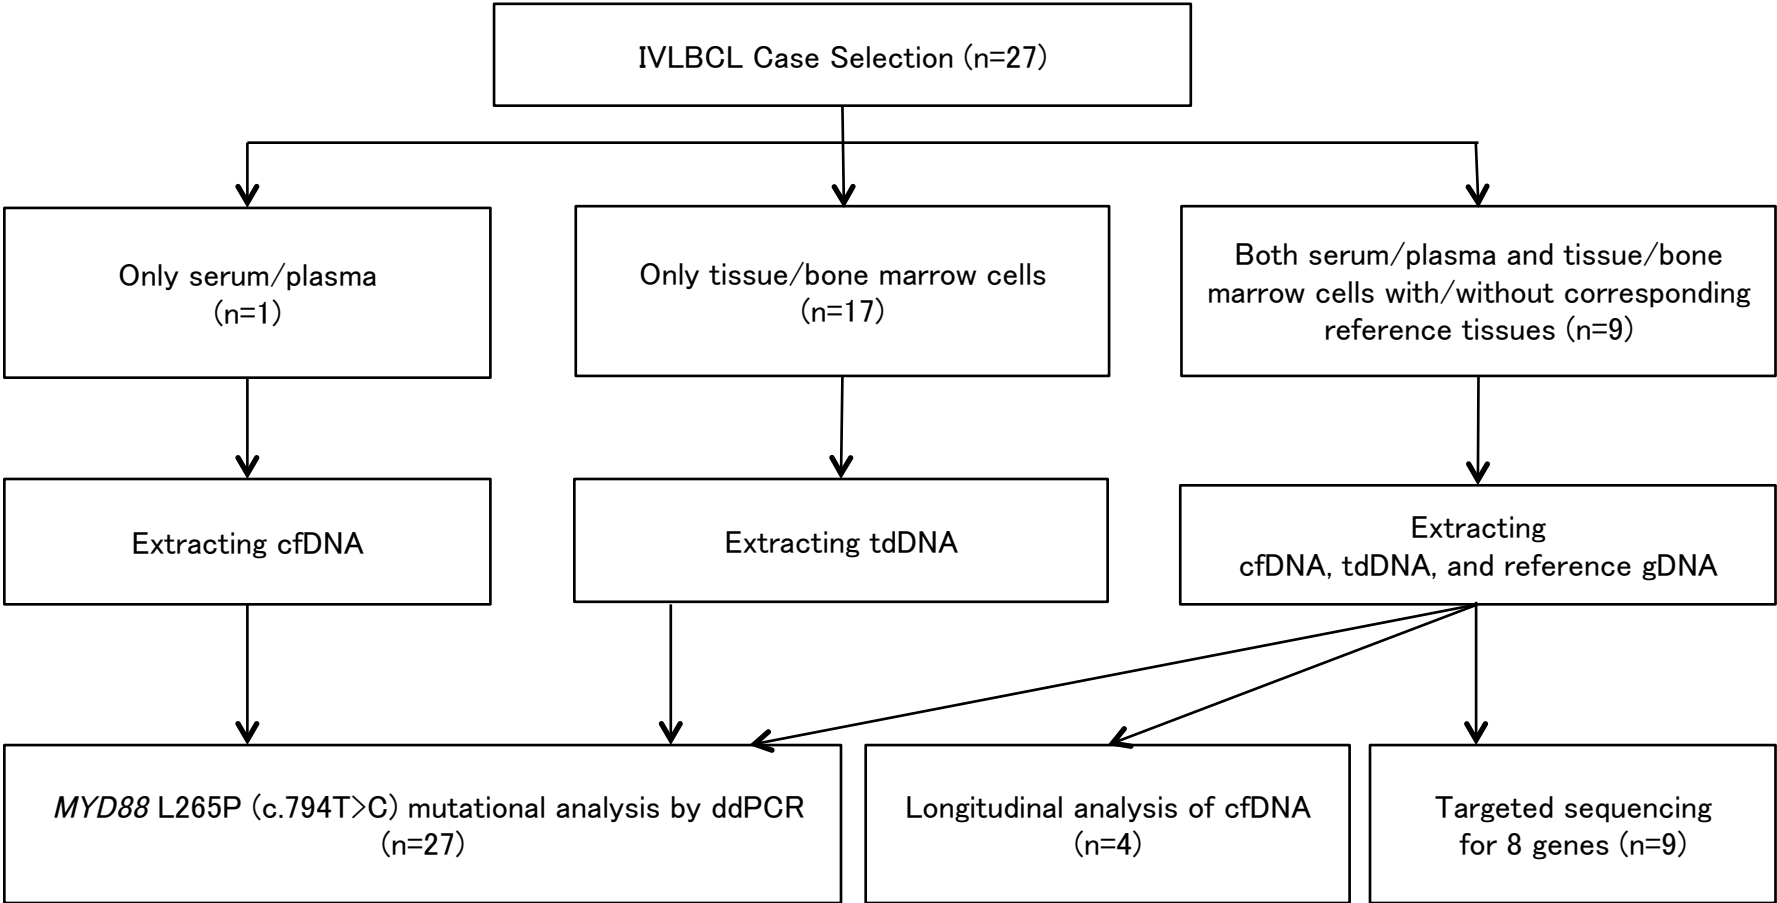

IVLBCL, intravascular large B-cell lymphoma; cfDNA, cell-free DNA; tdDNA, tissue-derived DNA; gDNA, genomic DNA; ddPCR, droplet digital PCR

Figure S2. Comparison of variant allele frequencies in tissue-derived DNA with those in cell-free DNA measured by digital droplet PCR for L265P *MYD88* among mutation-positive patients

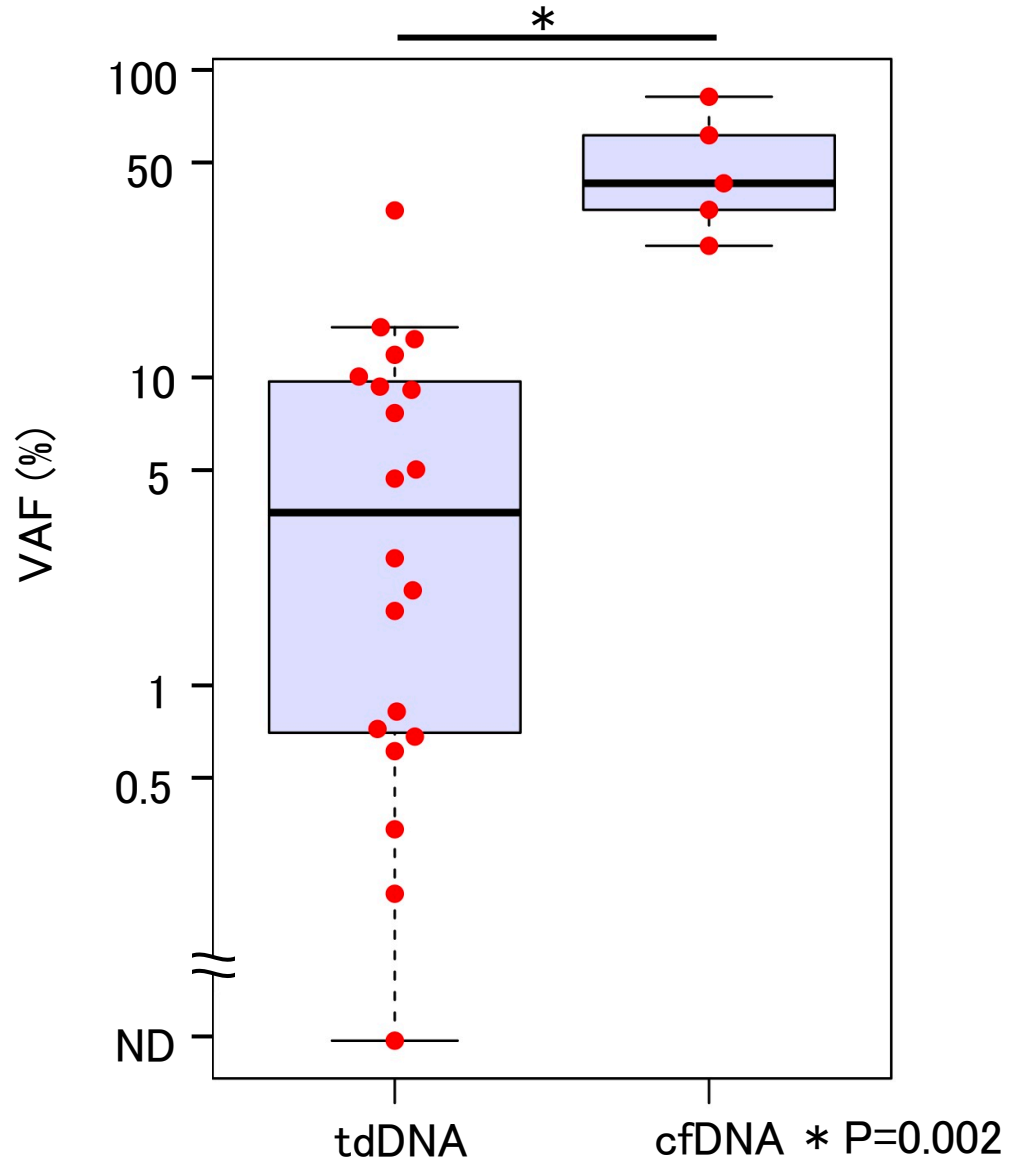

VAF, variant allele frequencies; tdDNA, tissue-derived DNA; cfDNA, cell-free DNA



Figure S3. Comparison of cell-free DNA concentrations extracted from paired serum and plasma samples

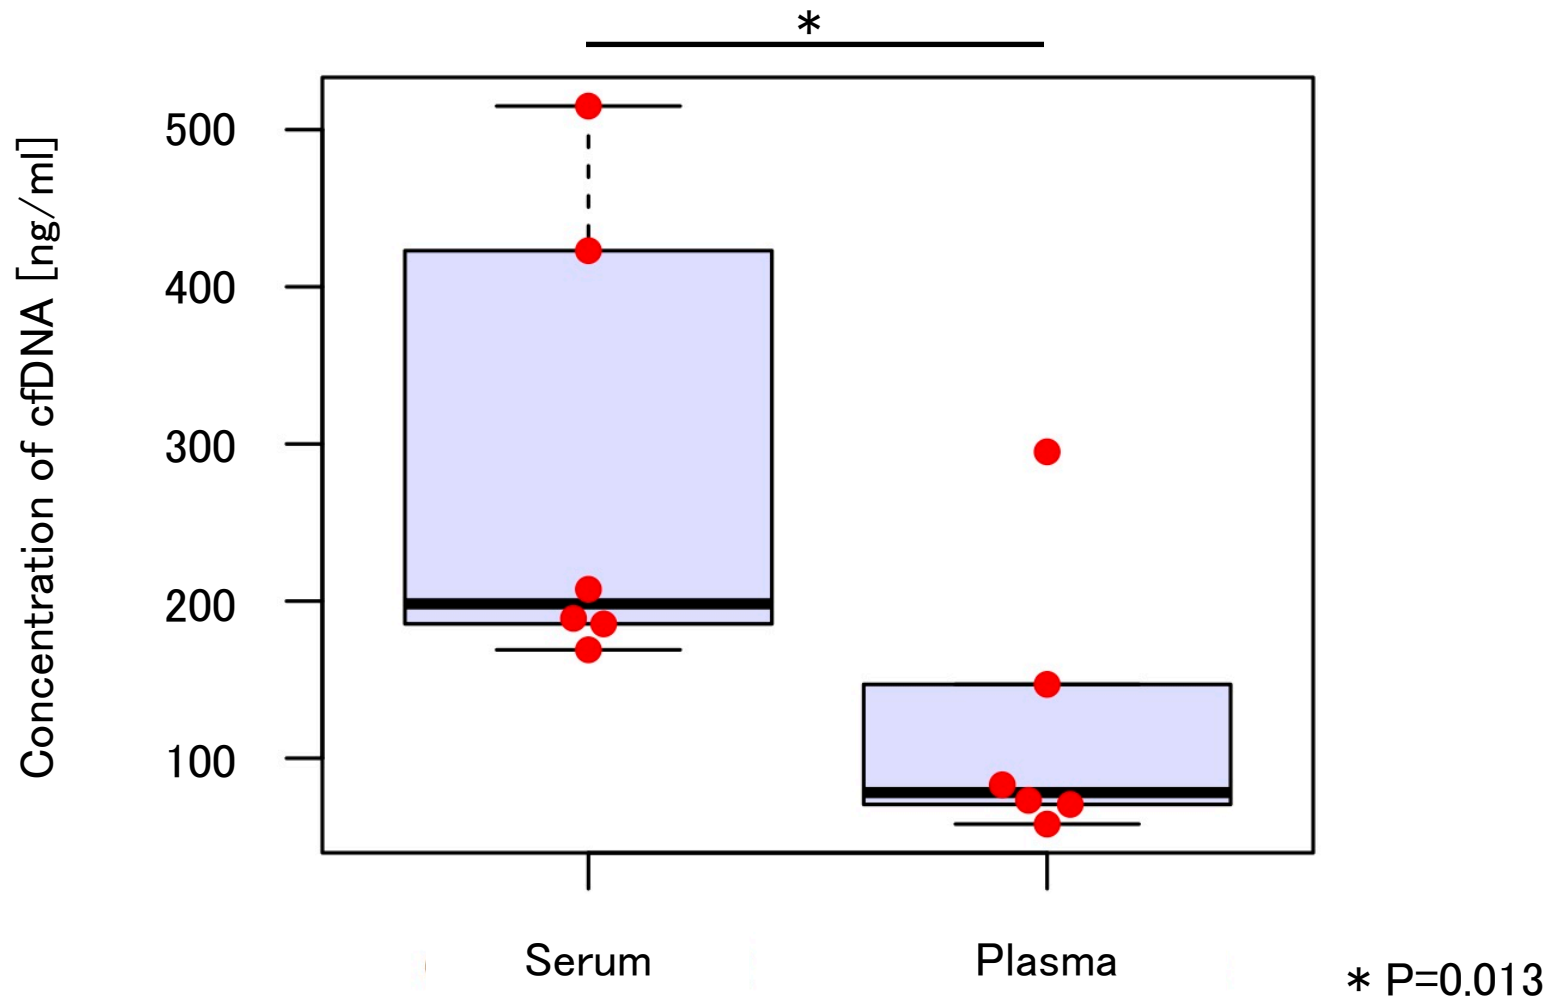

cfDNA, cell-free DNA

Figure S4. Comparison of variant allele frequencies in cell-free DNAs extracted from paired serum and plasma samples

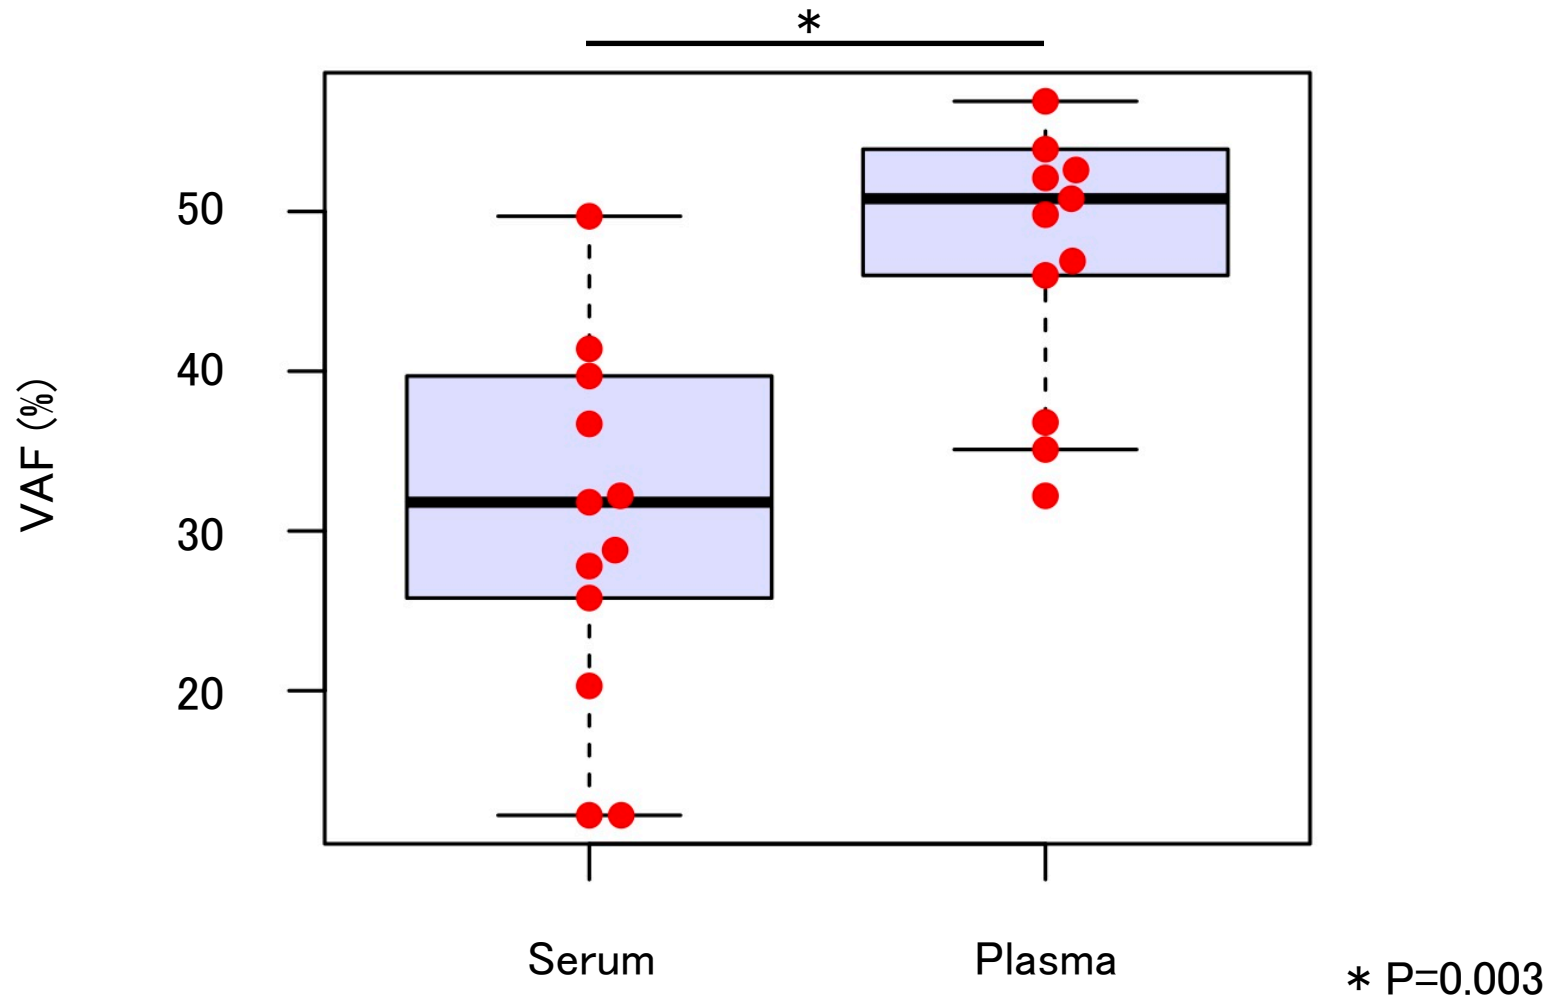

VAF, Variant allele frequency

Figure S5. Sequencing analysis pipeline

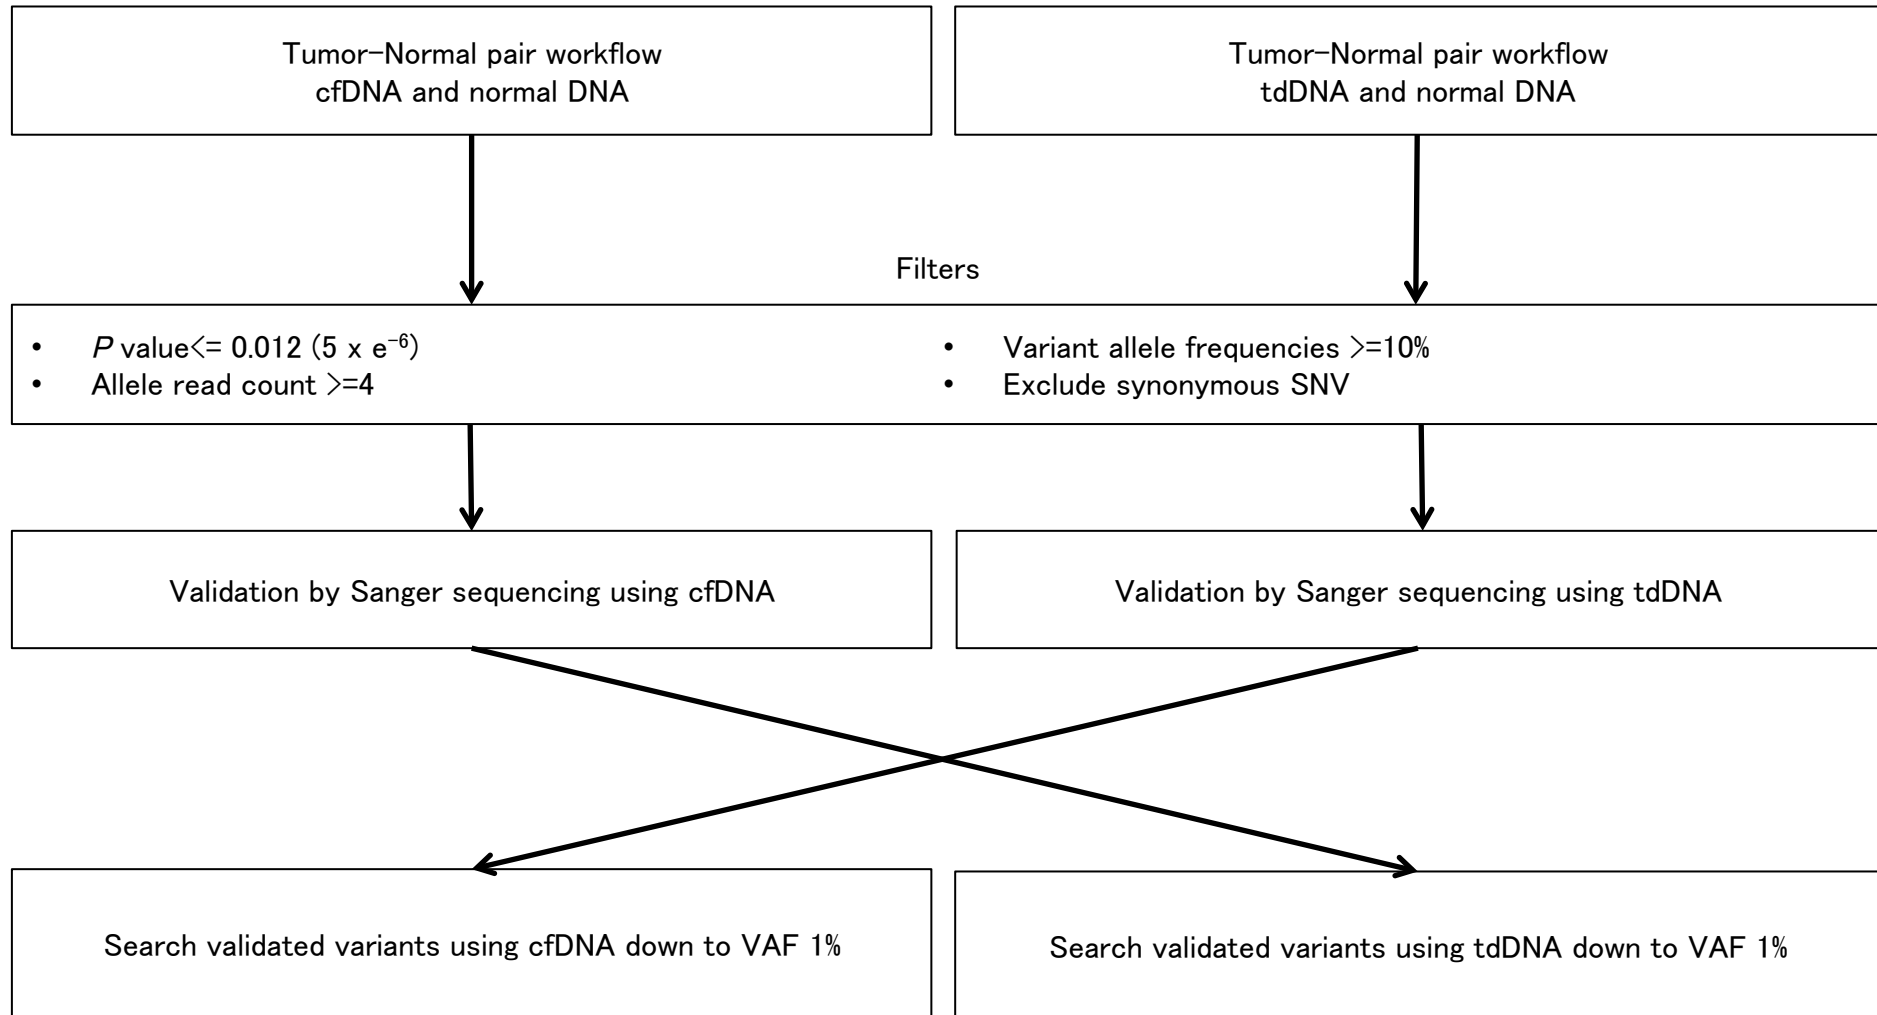

cfDNA, cell-free DNA, tdDNA, tissue derived DNA, SNV, single nucleotide variant, VAF, Variant allele frequencies
