# Supplementary material
Source: PubMed Central journal article supplement (PMC6058794)
Supplement: 2017_178830-Disclosures_and_Contributions.pdf [file 2017_178830-Disclosures_and_Contributions.pdf]

Haematologica  
HAEMATOL/2017/178830  
Version 4

Liquid biopsy for the identification of intravascular large B-cell  
lymphoma

Yasuhito Suehara, Mamiko Sakata-Yanagimoto, Keiichiro Hattori, Toru Nanmoku, Takayoshi Itoh, Daisuke Kaji, Go Yamamoto, Yoshiaki Abe, Kentaro Narita, Masami Takeuchi, Kosei Matsue, Taiki Sato, Masayuki Noguchi, Naoko Baba, Tatsuhiro Sakamoto, Manabu Kusakabe, Naoki Kurita, Takayasu Kato, Yasuhisa Yokoyama, Hidekazu Nishikii, Naoshi Obara, Yuichi Hasegawa, and Shigeru Chiba

Disclosures: This work was supported by Grants-in-Aid for Scientific Research (KAKENHI) from the Ministry of Education, Culture, Sports, Science and Technology of Japan (16H02660 to S.C.; JP16K15497 to M.S.-Y.); the Project for Cancer Research and Therapeutic Evolution (P-CREATE) from the Japan Agency for Medical Research and Development, AMED (S.C.); and research grants from the Uehara Memorial Foundation to S.C. and the Daiichi Sankyo Foundation of Life Science to M.S.-Y.

Contributions: Y.S., T.N., T.I., D.K., G.Y., Y.A., K.N., M.T., K.M., N.B., T. Sakamoto, M.K., N.K., T.K., Y.Y., H.N., N.O., and Y.H. collected samples and clinical information. T. Sato and M.N. performed pathological analysis. Y.S. and H.K. performed targeted sequencing and droplet digital PCR, Y.S. analyzed data and generated figures and tables, Y.S., M.S.-Y., and S.C. wrote the manuscript, M.S.-Y. and S.C. supervised the study. All authors participated in discussions of the data and results.
